# Supplementary material
Source: PubMed Central journal article supplement (PMC4811697)

## SUPPLEMENTAL MATERIAL

### **A streamlined hyperacute MRI protocol identifies tPA-eligible stroke patients when clinical impression is stroke mimic**

Manu S. Goyal, MD, MSc<sup>1</sup>, Brian G. Hoff, MSc<sup>2</sup>, Jennifer Williams, RN, PhD<sup>3</sup>, Naim Khoury, MD<sup>4</sup>, Rebecca Wiesehan, BA<sup>5</sup>, Laura Heitsch, MD<sup>6</sup>, Peter Panagos, MD<sup>6</sup>, Katie D. Vo, MD<sup>1</sup>, Tammie Benzinger, MD, PhD<sup>1</sup>, Colin P. Derdeyn, MD<sup>1,5,7</sup>, Jin-Moo Lee, MD, PhD<sup>1,5,8</sup>, and Andria L. Ford, MD, MSc<sup>5</sup>

<sup>1</sup> Mallinckrodt Institute of Radiology, Washington University School of Medicine

<sup>2</sup> Barnes-Jewish Hospital, Department of Operational Excellence

<sup>3</sup> Barnes-Jewish Hospital, Department of Emergency Services

<sup>4</sup> University of Montreal, Department of Neuroradiology

<sup>5</sup> Department of Neurology, Washington University School of Medicine

<sup>6</sup> Division of Emergency Medicine, Washington University School of Medicine

<sup>7</sup> Department of Neurological Surgery, Washington University School of Medicine

<sup>8</sup> Department of Biomedical Engineering, Washington University

#### **Supplemental Figure I**

The end result of the two day Value Stream Analysis mapped a planned “future state” for the hyperacute MRI protocol beginning from patient arrival to IV tPA delivery in the MRI suite. Target metrics for door-to- MRI and door-to-needle times while using hyperacute MRI for clinical decision-making were included.

FutureState Value Stream Map - August 2013 -- Hyper Acute MRI (MRI needed for intervention decision)

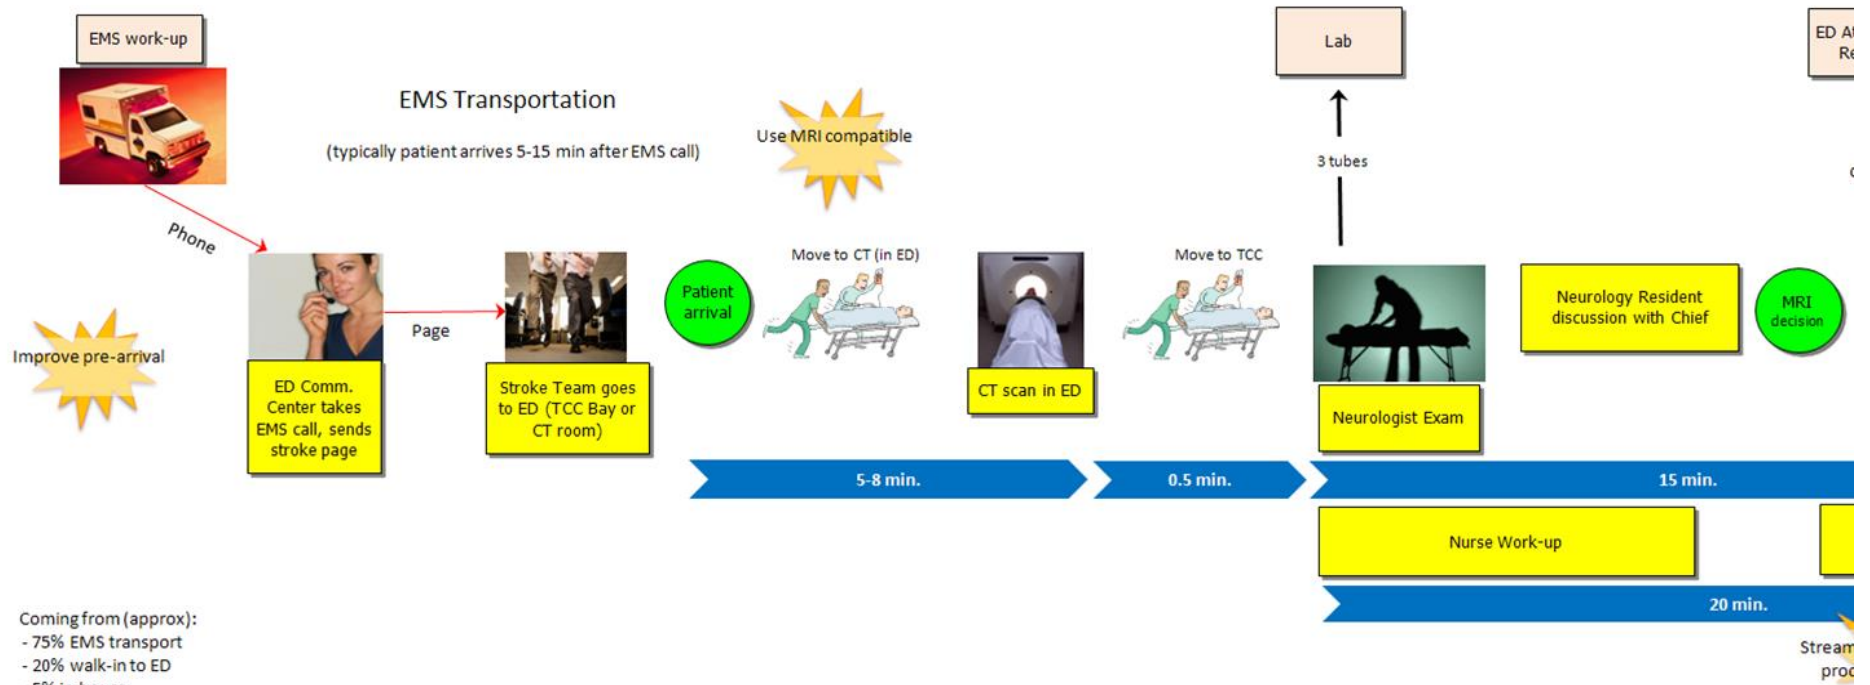

Coming from (approx):

- 75% EMS transport
- 20% walk-in to ED
- 5% in house

Map shows EMS transport

Stream proc

(Continued)

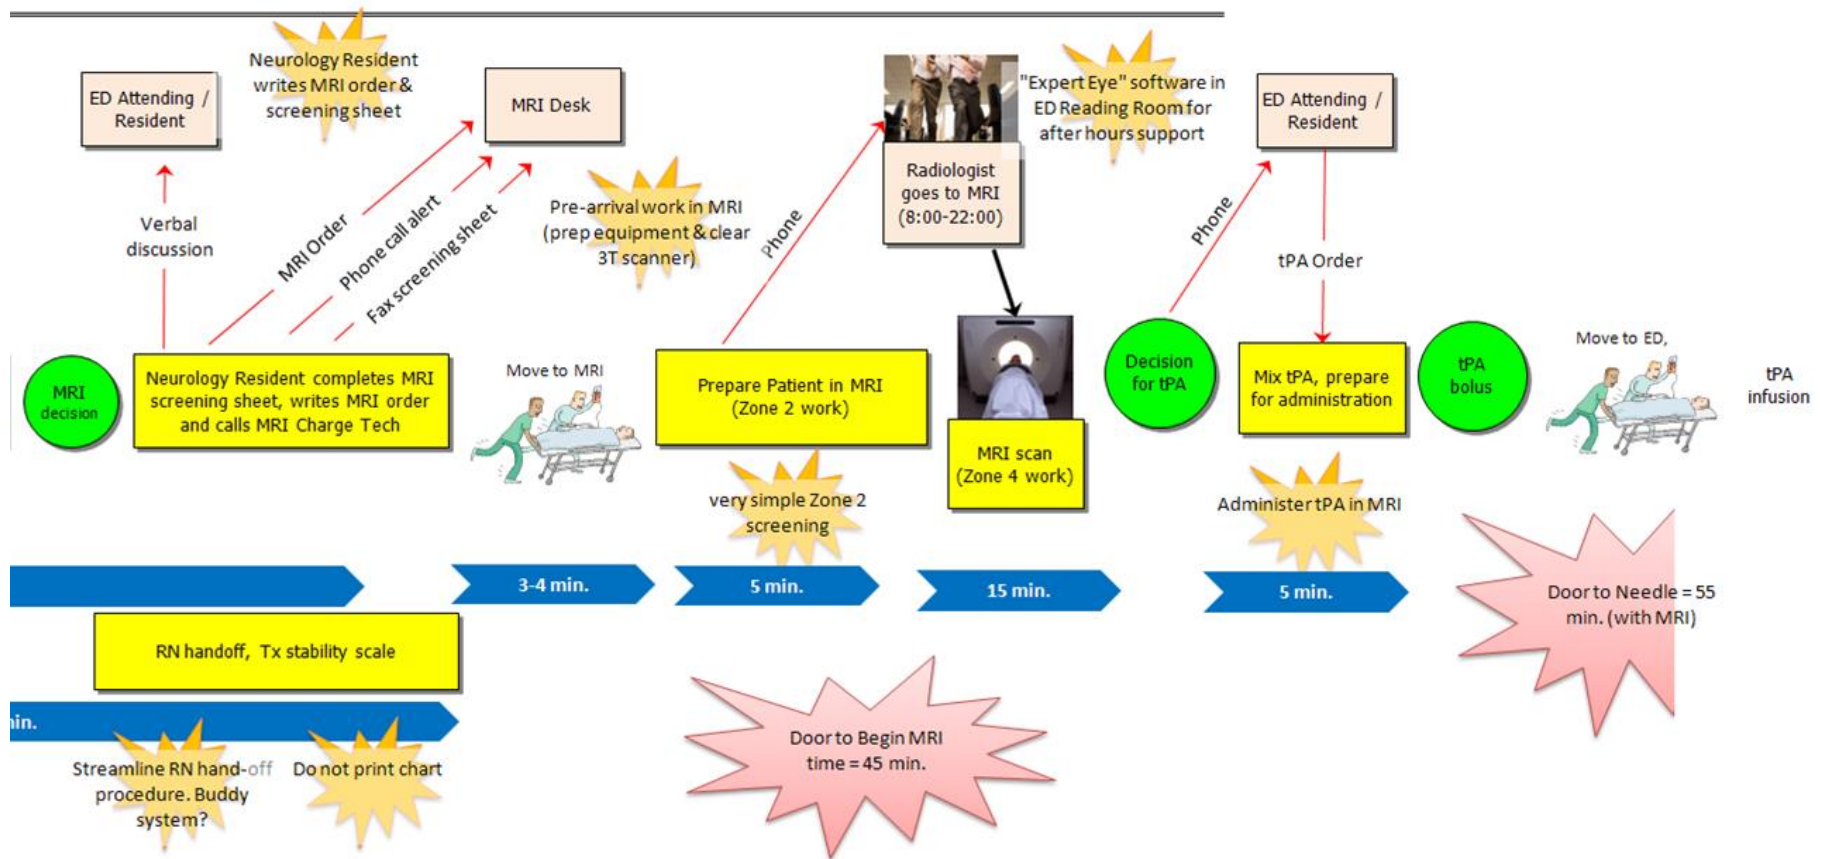

## Supplemental Figure II

After the two day VSA, several small group meetings were held in the form of rapid improvement events (RIE) over several weeks to implement solutions. The standard work for each role (RN, neurology, emergency medicine and radiology MDs, and MR technician) within each of the four phases was defined in detail: (1) Code Stroke in ED – this phase included the time from patient arrival until the decision to go to hMRI was made; (2) hMRI Process in ED – this phase included all standard work for patient and staff preparation for hMRI and transport to hMRI, (3) hMRI Process in MRI – this phase included safe patient transfer into the scanner room, scan completion, and radiology image review, and (4) tPA Delivery in MRI – this phase included repeat neurological evaluation and blood pressure to ensure patient remained an IV tPA candidate, preparation and delivery of tPA in the MRI suite. The standard work for each role (RN, neurology, emergency medicine and radiology MDs, and MR technician) within each of the four phases was defined in detail.

# Hyperacute MRI Protocol

ML-TP-0001

## Team Process: Code Stroke Process in Emergency Department

Document Owners & Approvers: ED Manager & Neurology Resident Program Director

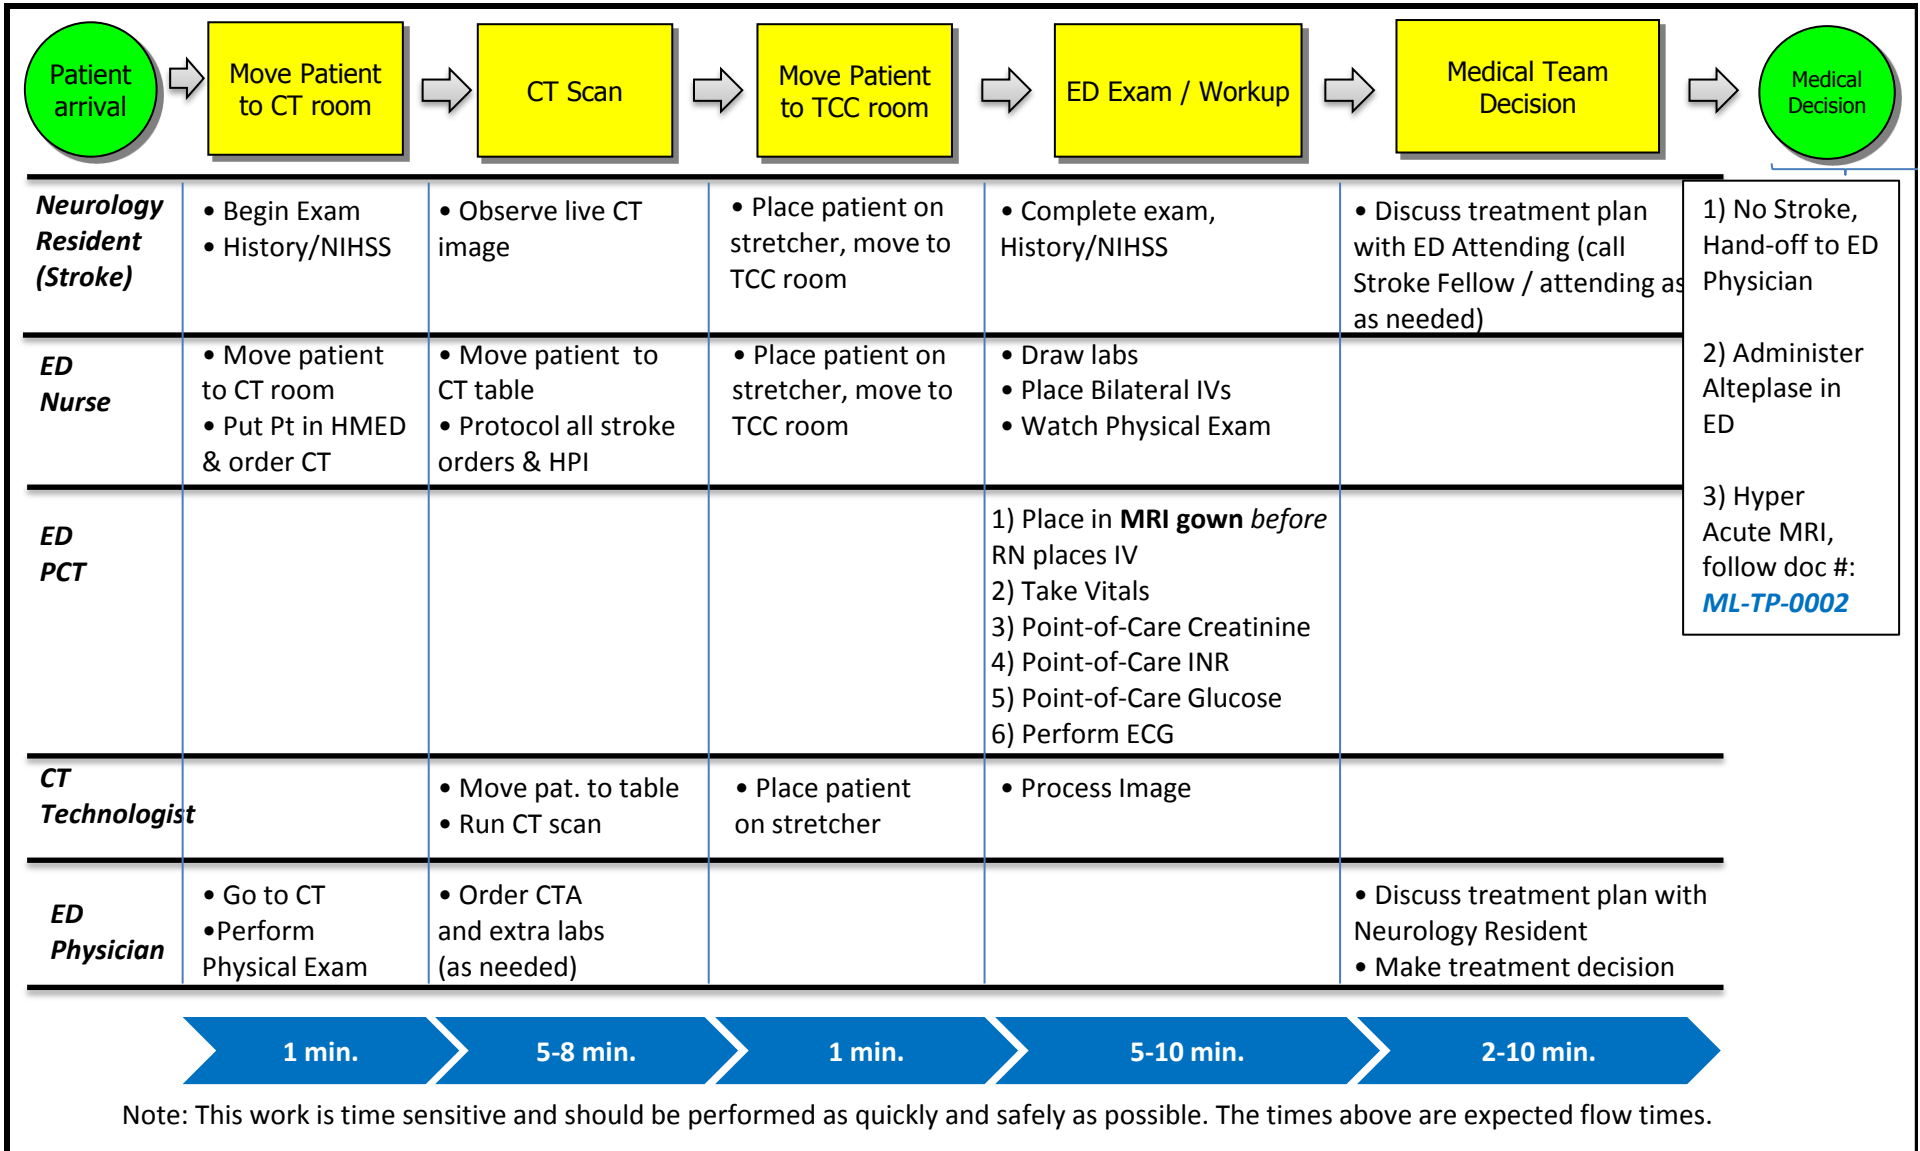

# Hyperacute MRI Protocol

ML-TP-0002

## Team Process: Hyper Acute MRI Process in Emergency Department

Document Owners & Approvers: ED Manager, MRI Supervisor & Neurology Resident Program Director

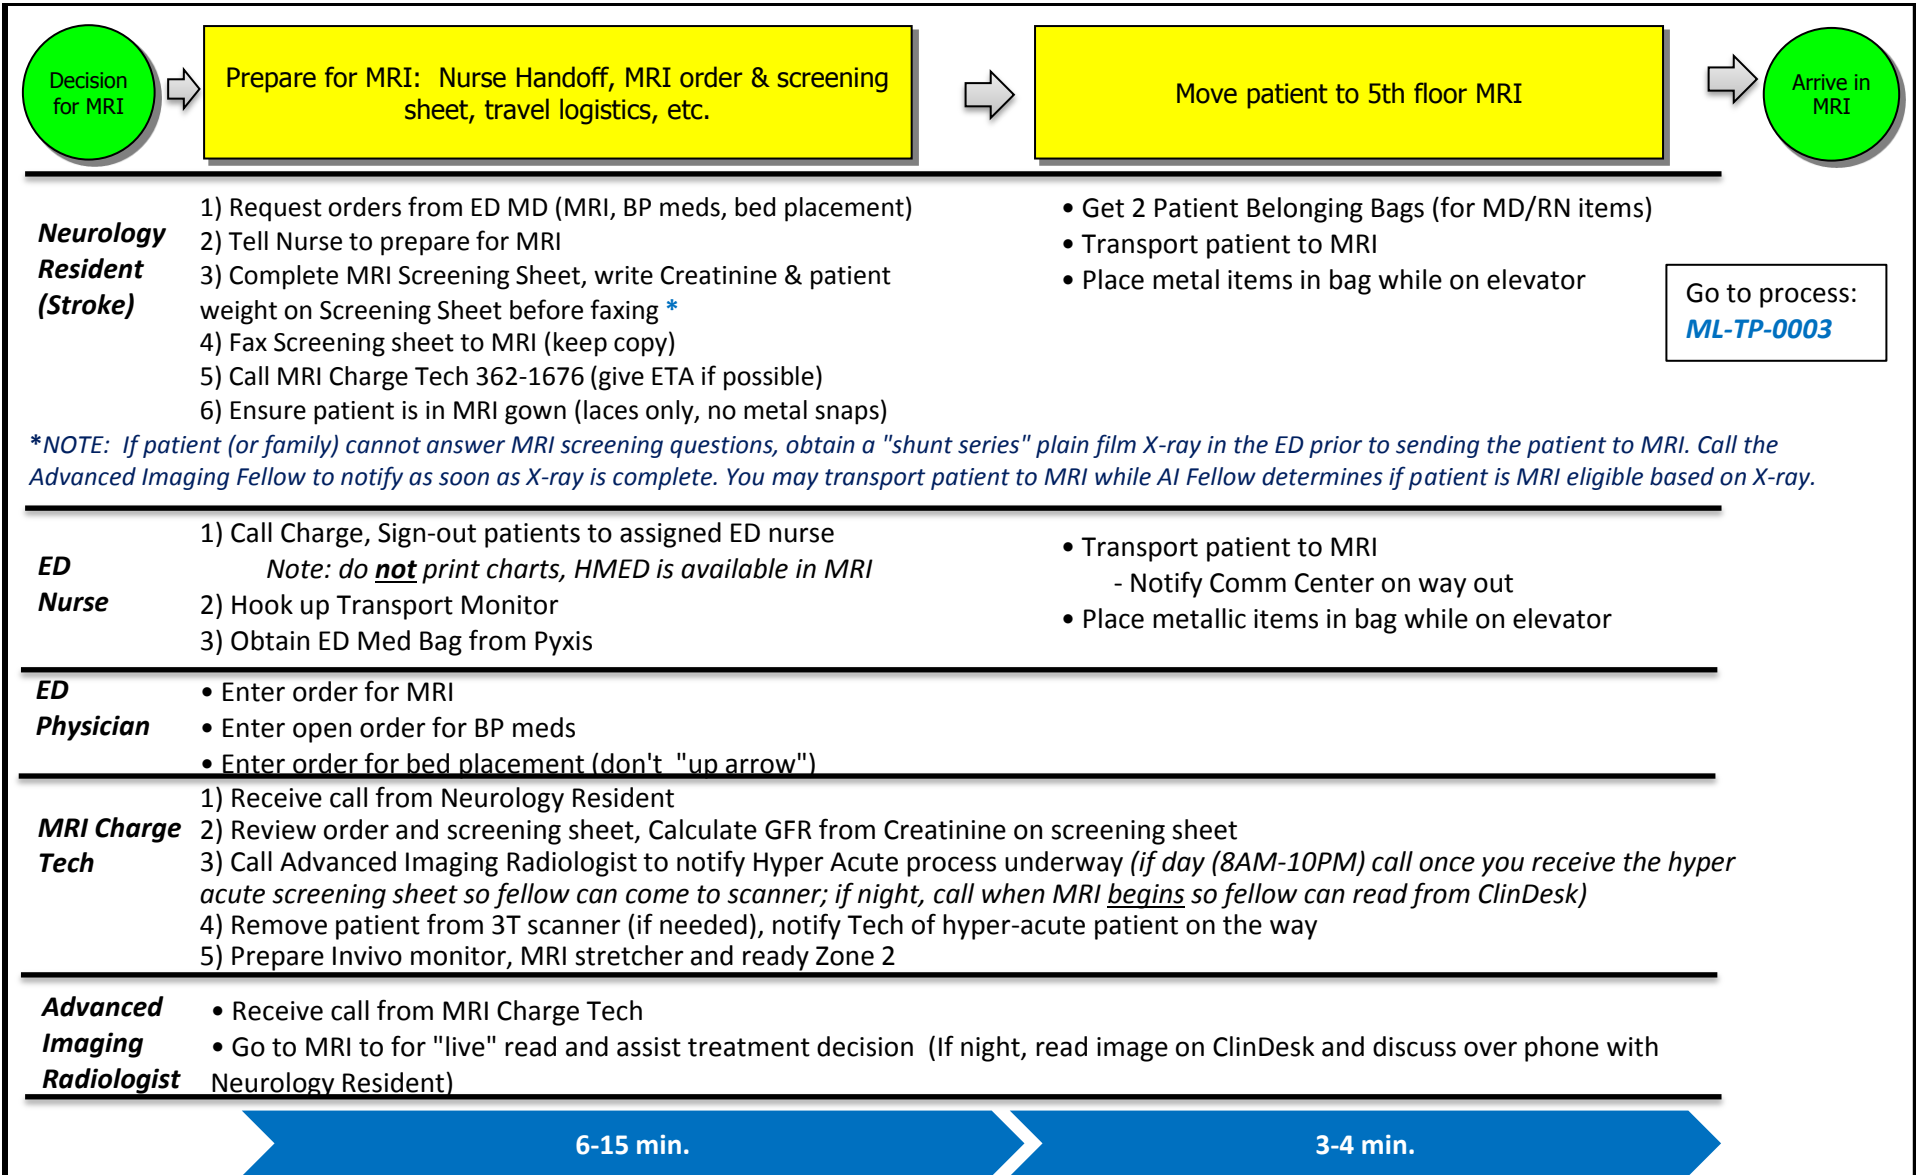

# Hyperacute MRI Protocol

ML-TP-0003

## Team Process: Hyper Acute MRI Process in MRI Department

Document Owners & Approvers: ED Manager, MRI Supervisor & Neurology Resident Program Director

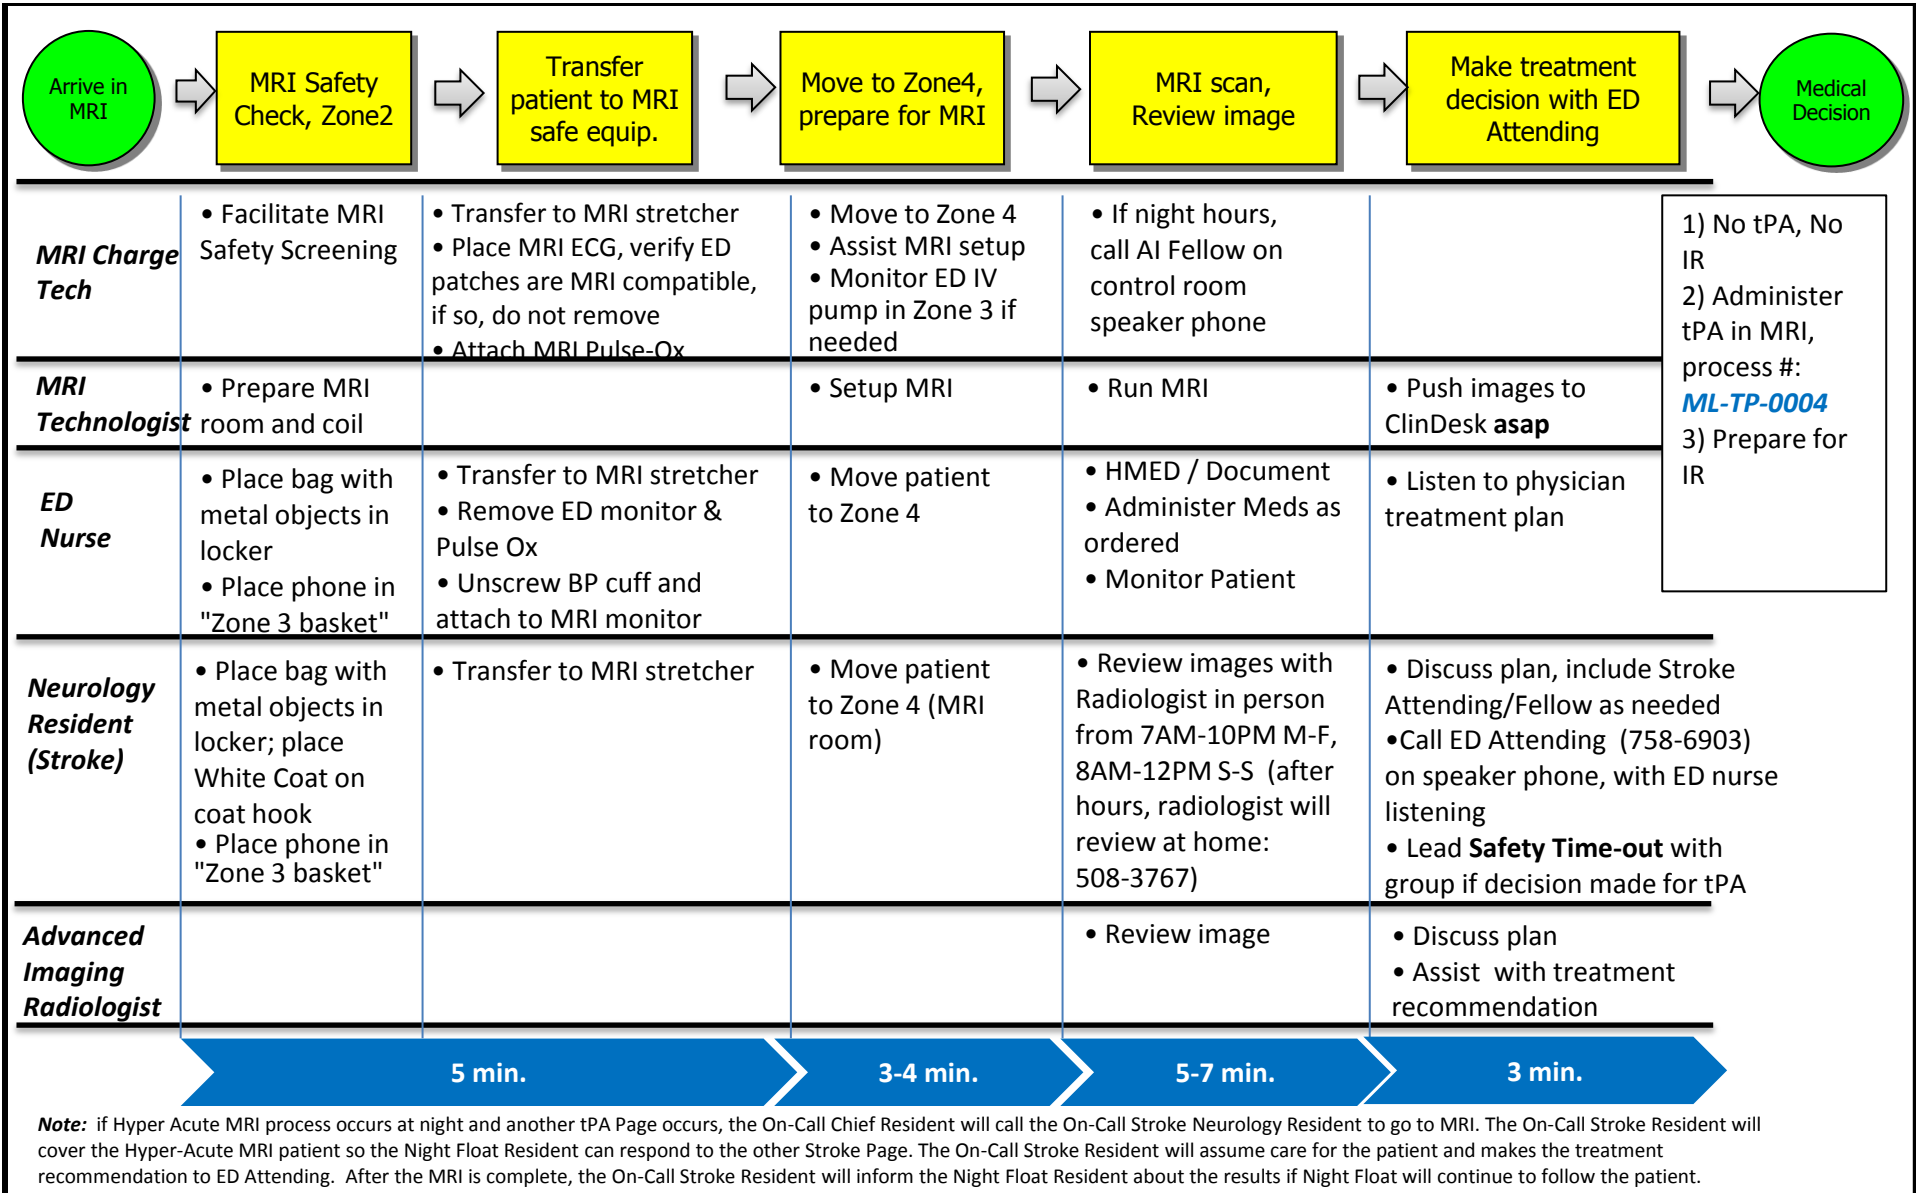

## Hyperacute MRI Protocol

ML-TP-0004

### Team Process: Alteplase Administration Process in MRI Department

Document Owners & Approvers: ED Manager, MRI Supervisor & Neurology Resident Program Director

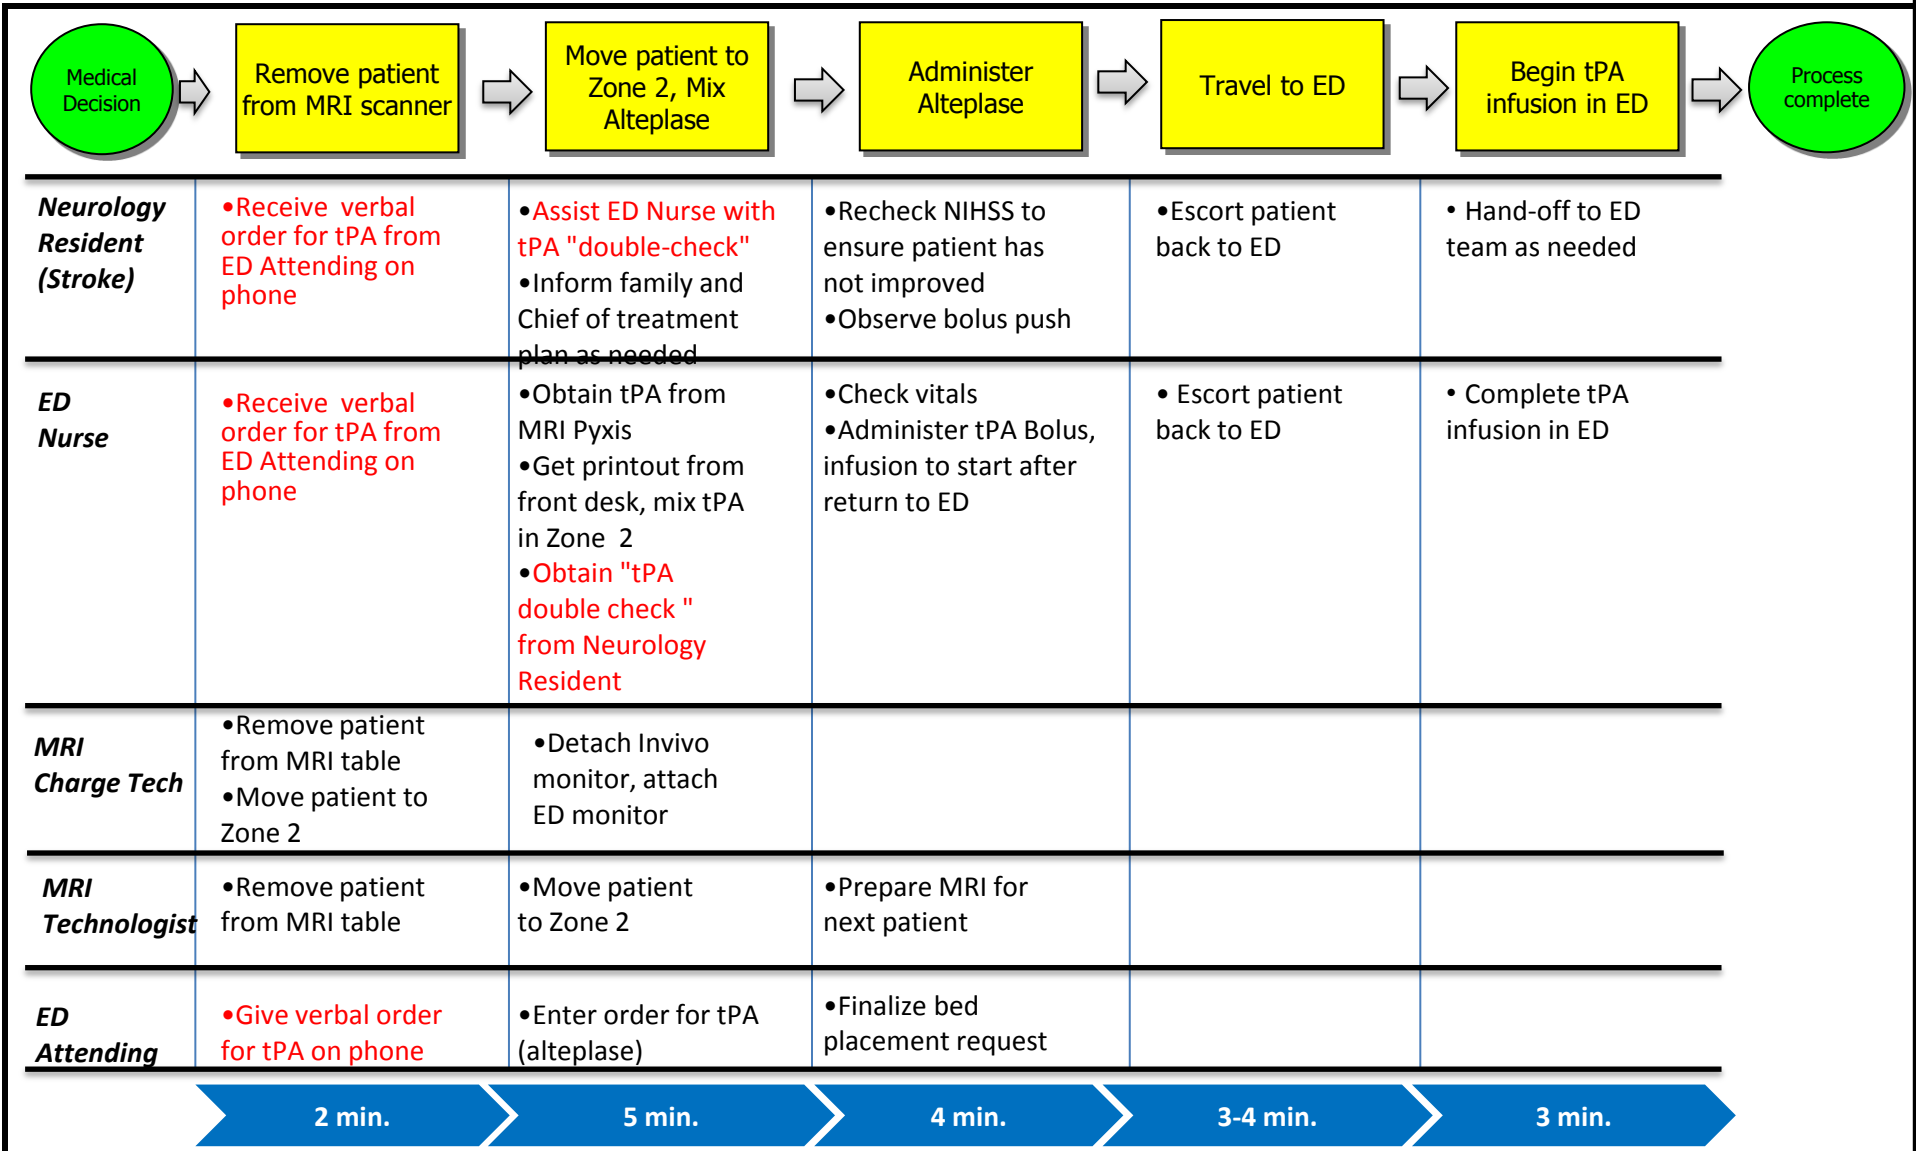

Supplement: NIHMS755806-supplement-Supplemental_Online_Figures_1_2.pdf [file NIHMS755806-supplement-Supplemental_Online_Figures_1_2.pdf]
